1  
2  
3  
4  
5  
6  
7  
8  
9  
10  
11  
12  
13  
14  
15  
16  
17  
18  
19  
20  
21  
22  
23  
24  
25  
26  
27

**The effects of haploid selection on Y chromosome evolution  
in a dioecious plant**

George Sandler\*, Felix E.G. Beaudry, Spencer C.H. Barrett, and Stephen I. Wright

Department of Ecology and Evolutionary Biology, University of Toronto  
25 Willcocks St., Toronto, ON M5S 3B2, Canada

Short running title: Haploid selection and sex chromosome evolution

Keyword: Sex chromosomes, recombination, ploidy

\* Author for correspondence: [george.sandler@mail.utoronto.ca](mailto:george.sandler@mail.utoronto.ca)

28 The evolution of sex chromosomes is classically considered to be driven by sexually  
29 antagonistic selection. However, selection during the haploid gametic phase of the  
30 lifecycle has recently received theoretical attention as possibly playing a central role  
31 in sex chromosome evolution, especially in plants. In particular, selection for reduced  
32 recombination on the sex chromosomes may occur as a result of intense haploid  
33 selection in males favouring the linkage of haploid beneficial alleles to an incipient Y  
34 chromosome. Here, we examine the evolution of gene expression in flower buds and  
35 pollen of two species of *Rumex* to test for signatures of sexual antagonism and  
36 haploid selection acting during sex chromosome evolution. We find that genes with  
37 high ancestral pollen expression bias occur more often on sex chromosomes than  
38 autosomes, and that genes on the Y chromosome are more likely to become  
39 enriched for pollen expression bias. We also find that genes with low expression in  
40 pollen are more likely to be lost from the Y chromosome. We found no comparable  
41 pattern for gene expression in male flower bud tissue suggesting that sexual  
42 antagonism among diploid parents may be a less important force in shaping Y  
43 chromosome evolution in *Rumex*. Our results suggest that selection during the  
44 haploid gametophytic stage of the lifecycle may be a major contributor to plant sex  
45 chromosome evolution.

46

47 **Abstract word count: 220**

48 **Total word count: 4084**

49

50

51

52 *IMPACT SUMMARY*

53 Sex chromosome evolution is most commonly explained as resulting from the  
54 resolution of sexual antagonism in the genome. Evidence for this hypothesis,  
55 however, is fairly limited. Recently, an alternative hypothesis has been proposed  
56 which posits that sex chromosomes evolve to link haploid beneficial mutations to the  
57 chromosome which experiences the most selection during the haploid phase. In  
58 plants, linkage of such genes to the Y chromosome may allow alleles beneficial in the  
59 haploid competitive arena to consistently segregate into males where pollen  
60 competition occurs. Here, we analyse gene expression data from three tissues of two  
61 species of plants in *Rumex*. We demonstrate that the sex chromosomes in these  
62 species are enriched for pollen-expressed genes, that the genes have become more  
63 pollen biased in expression, and that Y-linked genes are overexpressed in pollen. We  
64 found no comparable pattern in flower bud tissue where we expect sexual  
65 antagonism to be acting in the diploid phase. Our results support previous findings in  
66 *Silene* that haploid selection contributes to the retention of genes on the Y  
67 chromosome, but also provides novel empirical evidence for adaptive specialization  
68 of Y linked genes to the haploid phase of the plant life cycle.

69

70

71 Dioecy, the occurrence of populations with separate male and female  
72 individuals, is relatively uncommon in flowering plants, occurring in only 5-6% of  
73 species (Renner 2014). Of the 175 families in which dioecy is reported, only 19  
74 species from four families are known to possess heteromorphic sex chromosomes  
75 (Charlesworth 2002; Ming et al. 2011; Bachtrog et al. 2014). Since the development

76 of modern visualization and genomic techniques, the number of species with sex  
77 chromosomes has increased, but most recently identified sex chromosome systems  
78 in flowering plants are homomorphic (Harkess et al. 2015; Pucholt et al. 2017). This  
79 rarity of sex chromosomes in angiosperms raises the question of whether they may  
80 evolve in fundamentally different ways in plants than in animals, and has spurred  
81 speculation about the fundamental differences between these groups that may cause  
82 this difference in abundance.

83 Theory suggests sex chromosomes evolve from a pair of autosomes that  
84 acquired a sex-determining region, and subsequently accumulate sexually  
85 antagonistic alleles (Charlesworth 1996). The loss of genetic recombination between  
86 the sex chromosomes is thought to be selected to assure the segregation of sexually  
87 antagonistic alleles into the sex in which they are beneficial (Rice 1984; Lenormand  
88 2003). Though widely accepted, evidence supporting sex-specific selection is limited  
89 to a few systems (Foerster et al. 2007; Delph et al. 2010; Innocenti and Morrow  
90 2010) and has rarely been conclusively related to sex chromosome evolution (but  
91 see Wright et al. 2017).

92 One key contrast between flowering plants and animals that could contribute  
93 to differences in the evolution of their sex chromosomes is the predominance of a  
94 haploid gametophytic phase in the life cycle of plants (Haldane 1933). Genes  
95 expressed in the haploid phase should be subject to a unique selection regime  
96 because any recessive alleles in the diploid phase are unmasked in the haploid  
97 phase. Haploid selection is thought to be pervasive in angiosperms; for example, in  
98 the hermaphroditic plant *Arabidopsis thaliana* 60-70% of all genes are expressed in  
99 pollen (Hony and Twell 2004; Borges et al. 2008). The haploid selective regime

100 includes more efficient removal of deleterious mutations from a population as  
101 recessive deleterious phenotypic effects are expressed (Gerstein and Otto 2009).  
102 Similarly, recessive beneficial mutations are more likely to spread through  
103 populations. Indeed, in *Capsella grandiflora*, pollen-expressed genes experience  
104 stronger purifying and positive selection relative to non-pollen expressed genes  
105 (Arunkumar et al. 2013). Pollen competition is generally considered to be a common  
106 feature of angiosperms, increasing selective pressures imposed on plant genomes in  
107 the haploid phase (Moore and Pannell 2011).

108         Gene expression in pollen may contribute to the evolution of heteromorphic  
109 sex chromosomes in three complementary ways (Fig. 1). First, pollen-specific  
110 selection can favour the loss of recombination between the X and Y chromosomes,  
111 because linkage of alleles beneficial during pollen competition to the Y chromosome  
112 enables these alleles to spend more time in males where competition occurs (Scott  
113 and Otto 2017). Hereafter, we refer to this phenomenon as adaptive linkage (Fig. 1a).  
114 Second, once genes have become sex-linked, greater haploid selection in males may  
115 cause divergence and upregulation of Y-linked alleles specialized for pollen, akin to  
116 masculinization of the Y (Lahn and Page 1997; Zhou and Bachtrog 2012) and  
117 feminization of the X (Prince et al. 2010; Allen et al. 2013; Albritton et al. 2014)  
118 observed in some animal systems (hereafter “pollenization”) (Fig. 1b). Finally, haploid  
119 expression of genes on the Y can cause biased retention of pollen-expressed genes  
120 from the degenerating Y, as has been reported in *Silene latifolia* (Chibalina and  
121 Filatov 2011) (Fig. 2c). The study of pollen expression in young plant sex  
122 chromosome systems provides opportunities for the untangling of these three  
123 processes.

124 *Rumex* (Polygonaceae) provides a valuable study system to investigate the  
125 effects of haploid selection and sexual antagonism on sex chromosome evolution.  
126 Members of this genus possess uniovulate flowers, and open-pollinated flowers  
127 capture numerous pollen grains increasing the scope for pollen competition and  
128 haploid selection (Stehlik et al. 2008). Here, we sequence RNA from flower buds and  
129 mature pollen of annual, wind-pollinated *R. hastatulus* and *R. rothschildianus* to  
130 investigate patterns of gene expression and test the predictions of models of sex  
131 chromosome evolution driven by sexually antagonistic and haploid selection. Both  
132 species possess heteromorphic sex chromosomes, with non-orthologous sex-linked  
133 genes, consistent with independently-evolved sex chromosomes (Crowson et al.  
134 2017). The species also exhibit different degrees of Y-chromosome degeneration  
135 (Crowson et al. 2017). In *R. hastatulus* approximately three-quarters of genes have  
136 retained an expressed Y copy, whereas in *R. rothschildianus* only ~10% have been  
137 retained (Hough et al. 2014; Crowson et al. 2017). We find evidence for an increased  
138 rate of loss of genes with very low or no pollen expression from the Y chromosome.  
139 However, we also find evidence that genes on the sex chromosomes are ancestrally  
140 more pollen biased in their expression, and that this bias has increased since the loss  
141 of recombination. Finally, our results indicate that Y-linked alleles are overexpressed  
142 relative to their X-linked counterparts in pollen but not in flower buds, a pattern  
143 consistent with the hypothesis that haploid selection drives the cessation of  
144 recombination on *Rumex* Y chromosomes.

145

146

147

## 148 **METHODS**

149

### 150 **Tissue collection**

151 We used gene expression data from three tissues: pollen (a target for haploid  
152 selection), male flower bud (a target for sexual antagonism) and male leaf (control).

153 We collected mature pollen and filtered it through a fine nylon mesh before RNA  
154 extraction. We pooled pollen from two *R. rothschildianus* males due to low tissue

155 yields in this species but collected pollen from two male plants of *R. hastatulus*

156 individually. We collected developing, unopened male flower buds from two *R.*

157 *rothschildianus* individuals (sampled and sequenced independently) and one *R.*

158 *hastatulus* individual. We performed all RNA extractions using Spectrum™ Plant

159 Total RNA kits and stored RNA at -80°C. Leaf expression data from three *R.*

160 *hastatulus* and three *R. rothschildianus* males were obtained from previous work (see

161 Hough et al. 2014; Crowson et al. 2017).

162

### 163 **RNAseq and read analysis**

164 We sequenced RNA samples using Illumina Hi-seq 2500 sequencing with 100bp

165 paired end reads at the Centre for Applied Genomics, Toronto. We aligned samples

166 to existing female leaf transcriptome assemblies from both species (Hough et al.

167 2014; Crowson et al. 2017). We performed alignments using STAR (Dobin et al.

168 2013) after which we removed duplicate reads using Picard

169 (<http://broadinstitute.github.io/picard>). We used SAMtools to retrieve read counts for

170 downstream differential expression analysis (Li et al. 2009). We performed differential

171 expression analysis using the R package DESeq2 (Love et al. 2014) using read

172 counts obtained from SAMtools. We used >0.3 FPKM as a cut-off for active  
173 transcription, as recommended in (Ramsköld et al. 2009).

174

### 175 **Ortholog comparison**

176 We compared expression of genes that were retained on both the X and Y (hereafter  
177 XY genes) and their orthologs in *R. hastatulus* and *R. rothschildianus* to infer  
178 changes in expression of genes that had become sex linked since the species  
179 diverged. This is possible because the sex-linked genes in the two species of *Rumex*  
180 arose independently (Crowson et al. 2017). We obtained lists of orthologs between  
181 the species from Crowson et al. (2017). Because we were interested in the relative  
182 expression bias of XY linked genes, and the normalization of expression may be  
183 influenced by the proportion and number of sex-linked genes in the genome, we  
184 corrected for this by normalizing expression bias of XY genes by the average  
185 expression bias of autosomes. The method for calculating the average autosomal  
186 expression bias is given by:

$$\bar{x} = 2^{\left\{ \log_2 \frac{\# \text{normalised reads tissue 1}}{\# \text{normalised reads tissue 2}} \right\}}$$

187

188 After we calculated the average autosomal expression bias, we corrected individual  
189 XY gene bias using equation 2:

$$\log_2 \left\{ \frac{\# \text{normalised reads tissue 1} / \bar{x}}{\# \text{normalised reads tissue 2}} \right\}$$

190

191

192



## 193 **SNP calling and analysis of allele-specific expression**

194 We used the HaplotypeCaller tool in GATK (McKenna et al. 2010) to call SNP  
195 variants in our transcriptomes followed by the SelectVariants tool in GATK to select  
196 only biallelic, sex- linked SNPs. This list of SNPs was then run through the GATK  
197 ASEReadcounter (McKenna et al. 2010) tool with default settings to allow for  
198 estimation of allele-specific expression on the sex chromosomes. As all male tissue  
199 transcriptomes were aligned to female references, most alternate SNPs in XY linked  
200 genes represent the Y copy of a gene whereas most reference SNPs represent the X  
201 copy. However, this assumption can be violated if a polymorphism exists on the X. To  
202 account for this, we used population data from *R. hastatulus* to identify fixed SNP  
203 differences between the X and Y chromosomes (Hough et al. 2017). Fixed  
204 differences were determined if all females in a population were homozygous at an X  
205 linked SNP whereas all males were heterozygous for the same site. This yielded a  
206 list of high confidence sites for use in allele-specific expression analysis. No such  
207 population data was available for *R. rothschildianus* so instead we used SNPs with  
208 sex-linked segregation patterns within a family of sequenced plants (Crowson et al.  
209 2017).

210 The lists of high confidence sites for allele-specific expression analysis were  
211 then run through the tool GeneiASE (Edsgård et al. 2016) to find statistically  
212 significant cases of allelic bias in expression. Since GeneiASE does not require  
213 phasing, the output identifies which genes have a bias in expression but not the  
214 direction of this bias. We averaged the log 2-fold expression change of each high  
215 confidence XY site to infer whether the reference (X) or alternate (Y) copy was  
216 overexpressed.

## 217 **Statistical analysis**

218 All *P*-values reported in this study are two tailed. We used Fisher's exact tests to test  
219 for significant differences between counts of differentially expressed genes. Student's  
220 *t*-tests were used to compare mean FPKM pollen expression of hemizygous and XY  
221 linked genes. We conducted Wilcoxon signed-rank tests to compare tissue  
222 expression bias of XY and ortholog genes. Multiple test correction is applied by both  
223 DESeq2 and GeneiASE using the Benjamin-Hochberg method, only genes with an  
224 adjusted *P*-value of <0.05 were considered as differentially expressed (for DESeq2),  
225 or as having significant allele biased expression (for GeneiASE). We used Fisher's  
226 combined probability tests to combine the individual gene *P*-values using GeneiASE  
227 for each tissue sample to yield one *P*-value per gene. We then used Fisher's exact  
228 tests to test for differences in numbers of X vs. Y biased genes in our allele-specific  
229 expression analysis. We did not test for differences in numbers of genes without  
230 allele-specific expression, because the fraction of non-biased genes heavily depends  
231 on factors such as sequencing depth, which can vary from sample to sample. We  
232 used counts of overexpressed genes in leaf as the null expected counts in our  
233 statistical tests, as we did not expect either haploid selection or sexual antagonism to  
234 be driving Y chromosome evolution in leaf tissue.

235

## 236 **Result and Discussion**

237

### 238 **Gene expression is widespread in pollen**

239 In *R. hastatulus*, 39.1% of all predicted leaf transcripts had signatures of active pollen  
240 transcription, whereas 50.9% of leaf transcripts in *R. rothschildianus* showed

241 evidence of pollen expression. These results suggest widespread gene expression in  
242 the haploid phase. Nevertheless, the values we obtained were significantly lower  
243 than in flower bud tissue, where 81.7% and 87.3% of predicted leaf transcripts were  
244 actively transcribed in *R. hastatulus* and *R. rothschildianus*, respectively. Despite  
245 overlap between tissues in genes with active expression, principle components  
246 analysis (Supplementary Fig. 1) of individual samples indicated strong differentiation  
247 between tissues in expression, particularly for pollen.

248

### 249 **Sex chromosomes are enriched for haploid expressed genes**

250 To investigate the relative importance of sexual antagonism and haploid selection  
251 during sex chromosome evolution, we compared sex-linked and autosomal genes for  
252 expression bias across three tissues. We focused on expression differences between  
253 male leaf, male developing flower bud and mature pollen. The chromosomal location  
254 of genes was previously evaluated using SNP segregation patterns for both *R.*  
255 *hastatulus* (Hough et al. 2014) and *R. rothschildianus* (Crowson et al. 2017). We  
256 compared counts of genes identified as having significantly different expression  
257 (Benjamin-Hochberg FDR adjusted  $P < 0.05$ ) between two pairs of tissues to quantify  
258 expression bias. When comparing leaf and pollen expression patterns (Fig. 2a), we  
259 found that sex-linked genes with retained Y copies (hereafter XY genes) were more  
260 often significantly pollen biased than autosomal genes in both *R. hastatulus* (Fisher's  
261 exact test,  $P < 0.0001$ ) and *R. rothschildianus* (Fisher's exact test,  $P < 0.0001$ ). The  
262 same was true when comparing pollen to flower bud expression in *R. hastatulus*  
263 (Fisher's exact test,  $P = 0.0006$ ) and *R. rothschildianus* (Fisher's exact test,  $P <$   
264  $0.0001$ ) (Fig. 2b). Given this evidence for enrichment of pollen-biased genes on the

265 sex chromosomes, we next sought to evaluate the possible role of different  
266 evolutionary mechanisms driving this enrichment (Fig. 1).

267

### 268 **Haploid selection maintains pollen-expressed genes on the Y chromosome**

269 To test whether haploid expression of Y-linked genes slows down Y chromosome  
270 degeneration in *Rumex* (Fig. 1c), we compared the pollen expression of hemizygous  
271 genes (which lack a Y-expressed copy) and XY genes (Chibalina and Filatov 2011;  
272 Crowson et al. 2017). We found that hemizygous genes showed significantly reduced  
273 pollen expression compared with XY genes in *R. hastatulus* (Welch Two Sample *t*-  
274 test,  $t = -6.7295$ ,  $df = 154.31$ ,  $P = 3.145e-10$ ) and *R. rothschildianus* (Welch Two  
275 Sample *t*-test,  $t = -14.019$ ,  $df = 552.18$ ,  $P = 2.2e-16$ ) (Supplementary Fig. 2). This  
276 effect is particularly prominent in the more degenerated *R. rothschildianus*: the effect  
277 size (Cohen's *D*) in *R. hastatulus* is 0.74, whereas it is 1.16 in *R. rothschildianus*.  
278 This difference was not simply due to hemizygous genes being generally less  
279 expressed (Crowson et al. 2017); differential expression analyses indicated that  
280 hemizygous genes had a deficiency of pollen-biased relative to either leaf- or flower-  
281 biased genes compared with XY genes in both *R. hastatulus* (Fisher's exact test,  $P <$   
282  $0.0001$  leaf/pollen;  $P < 0.0252$  flower bud/pollen) and *R. rothschildianus* (Fisher's  
283 exact test,  $P < 0.0001$  leaf/pollen;  $P < 0.0001$  flower bud/pollen) (Fig. 2). Again, this  
284 effect was more pronounced in *R. rothschildianus*. Our results suggest that haploid  
285 selection retains pollen expressed genes, as also reported in *Silene latifolia*, another  
286 XY plant sex chromosome system (Chibalina and Filatov 2011). It is interesting to  
287 note that the difference in pollen expression between XY and hemizygous genes has  
288 diverged to a greater extent in *R. rothschildianus* suggesting that haploid selection

289 does indeed slow down Y chromosome degeneration even in highly heteromorphic  
290 plant sex chromosome systems.

291

292 **Sex chromosome linked genes show signals of ancestral and derived pollen**  
293 **bias**

294 We next investigated whether the footprint of differential Y chromosome degeneration  
295 could fully account for the patterns of pollen bias at XY genes, without needing to  
296 invoke adaptive evolution of sex linkage or Y chromosome pollenization. To do this,  
297 we examined the extent of pollen bias on all sex chromosome-linked genes,  
298 combining both hemizygous and XY genes. By combining these gene sets, our  
299 analysis should more closely resemble the ancestral set of genes that evolved to  
300 become linked to the sex-determining region. The combined data still showed an  
301 enrichment of pollen-biased genes across all sex-linked genes analysed together for  
302 both *R. hastatulus* (Fisher's exact test,  $P < 0.0001$ ,  $P = 0.0015$ ; pollen/leaf and  
303 pollen/flower bud respectively) and *R. rothschildianus* (Fisher's exact test,  $P =$   
304  $0.0005$ ,  $P = 0.0314$ ; pollen/leaf and pollen/flower bud, respectively) (Supplementary  
305 Fig. 3). However, there exists an ascertainment bias in this reconstructed gene set  
306 as more SNP segregation patterns can be used to identify XY genes compared to  
307 hemizygous genes (in particular, divergent SNPs between X and Y chromosomes)  
308 resulting in overrepresentation of XY genes on reconstructed XY chromosomes  
309 (Hough et al. 2014; Crowson et al. 2017). To account for this bias, we used existing  
310 published XY gene lists (Hough et al. 2014; Crowson et al. 2017) which only  
311 contained XY genes identified with the same set of SNP segregation patterns  
312 (polymorphisms on the X chromosome) as hemizygous genes. This procedure

313 therefore removed any ascertainment bias. We still found evidence for a significant  
314 enrichment of pollen-biased genes in *R. hastatulus* (Fisher's exact test,  $P < 0.0001$   
315 for both tissue comparisons), but not in *R. rothschildianus*, where sex-linked genes  
316 as a whole were significantly depleted for pollen enrichment (Fisher's exact test,  $P =$   
317  $0.0224$ ,  $P = 0.0074$ ; pollen/leaf and pollen/flower bud, respectively). Thus, overall the  
318 enrichment of pollen-expressed genes does not appear to be a simple function of the  
319 Y degeneration of genes not expressed in pollen. However, any signal of early  
320 enrichment may be eroded by extensive Y degeneration in the more degenerated *R.*  
321 *rothschildianus* and possibly secondary movement of genes on and off the X  
322 chromosome.

323         Because Y-chromosome degeneration alone is not sufficient to explain the  
324 enrichment of pollen expression on XY linked genes, we further searched for  
325 evidence of Y chromosome pollenization (Fig. 1b), or adaptive sex linkage (Fig. 1a).  
326 The sex-linked genes in *R. rothschildianus* and *R. hastatulus* have arisen  
327 independently (Crowson et al. 2017), thus ancestral expression of XY linked genes in  
328 one species should be represented by the autosomal orthologs of these genes in the  
329 other species. Therefore, we next attempted to disentangle the ancestral and  
330 subsequent evolution of expression bias in sex-linked genes.

331         We first investigated whether orthologs of XY-linked genes were ancestrally  
332 more pollen biased than other autosomal genes to determine whether pollen bias is  
333 present before linkage to the sex chromosomes, indicative of adaptive sex linkage.  
334 We found that *R. hastatulus* XY-linked genes were ancestrally more pollen biased  
335 than other autosomal genes in a comparison between leaf and pollen (Fisher's exact  
336 test,  $P = 0.0344$ ) (Supplementary Fig. 4); although a similar trend was evident

337 comparing pollen and flower buds, the difference was not significant (Fisher's exact  
338 test,  $P = 0.1197$ ). Similarly, *R. rothschildianus* XY-linked genes were ancestrally  
339 more pollen biased than other autosomal genes in both tissue comparisons (Fisher's  
340 exact test  $P < 0.0001$ ,  $P = 0.0002$ ; pollen/leaf and pollen/flower bud respectively).  
341 These findings suggest that *R. hastatulus* XY ancestors were mildly pollen biased  
342 and *R. rothschildianus* XY ancestors were highly pollen biased, a difference that may  
343 be explained by the large difference in levels of Y chromosome degeneration  
344 between the species. In particular, because the relatively intact Y chromosomes of *R.*  
345 *hastatulus* still contain a considerable number of genes not expressed in the haploid  
346 phase, the bias towards pollen expression should be less severe. Overall, our results  
347 suggest that pollen-biased genes may have been involved early in the evolution of  
348 sex chromosomes, suggesting adaptive linkage of haploid beneficial alleles.

349 To determine whether XY-linked gene ancestors became further pollenized  
350 after linkage to the sex chromosomes, we performed reciprocal pairwise comparisons  
351 of expression patterns of XY genes and their non-XY linked orthologs. Direct  
352 comparisons between these gene sets are difficult to interpret due to apparent  
353 genome-wide divergence in expression patterns between *R. hastatulus* and *R.*  
354 *rothschildianus* (Fig. 2). To account for this divergence, we normalized the  
355 expression bias of XY and orthologous genes by the average expression bias of their  
356 respective autosomal genes to uncover relative differences in expression between  
357 species (for details see methods).

358 We found that XY-linked genes in *R. hastatulus* were significantly more pollen  
359 biased than their autosomal orthologs in *R. rothschildianus* in both tissue  
360 comparisons (Wilcoxon's sign rank test  $P < 0.01$  both tissue comparisons,  $Z = -13.58$

361 pollen/leaf,  $Z = -3.941$  pollen/flower bud) (Fig. 3). The same was true for *R.*  
362 *rothschildianus* when comparing pollen and flower buds (Wilcoxon's sign rank test  $P$   
363 = 0.04,  $Z = -2.022$ ) but not when comparing pollen and leaf where XY genes  
364 appeared to be more pollen biased ancestrally (Wilcoxon's sign rank test  $P = 0.01$ ,  $Z$   
365 = -6.418). Our results support the hypothesis that XY-linked genes play an important  
366 role in the haploid gametophytic phase, particularly for *R. hastatulus*, by becoming  
367 enriched for pollen expression following sex linkage. We posit that the lack of  
368 pollenization observed when comparing leaf and pollen in *R. rothschildianus* may be  
369 related to the highly degenerate nature of the Y chromosomes in this species, where  
370 long periods of inefficient selection may have eroded signatures of pollenization on  
371 this chromosome.

372

### 373 **Widespread Y overexpression is present specifically in pollen**

374 If pollen overexpression on sex chromosomes is due to adaptive linkage on the Y  
375 chromosome (Fig. 1a), we would predict that it is driven by upregulation of Y-linked  
376 genes expressed in pollen. To test this hypothesis, we examined allele-specific gene  
377 expression on the sex chromosomes across several tissues. We predicted Y-bias in  
378 pollen if adaptive linkage contributes to the formation of plant sex chromosomes, and  
379 Y-bias in male flower buds if sexual antagonism is the dominant force driving sex  
380 chromosome evolution. In contrast, we predicted minimal Y-bias in leaf, or reduced  
381 expression on the Y due to degeneration (Hough et al. 2014; Crowson et al. 2017),  
382 and therefore this tissue was used as a control.

383 We found no consistent chromosomal bias for allelic overexpression in leaf  
384 (14.6% X overexpressed, 16.4% Y overexpressed) and flower bud (7.7% X



385 overexpressed, 7.0% Y overexpressed) of *R. hastatulus*. There was also no  
386 significant difference in the pattern of allelic overexpression between leaf and flower  
387 bud (Fisher's exact test  $P = 0.7083$ ) (Fig. 4). In pollen, however, 44.9% of XY genes  
388 exhibited Y overexpression whereas only 16.4% had X overexpression, indicating  
389 that XY genes had significantly more Y overexpression in pollen than leaf (Fisher's  
390 exact test  $P = 0.0021$ ).

391 In *R. rothschildianus* we found overall more X allele-biased genes in flower  
392 bud (67.5% X overexpression, 18.2% Y overexpression) and leaf (64.4% X  
393 overexpression, 24.3% Y overexpression), with no significant difference in the  
394 direction of allele-specific expression between these tissues (Fisher's exact test,  $P =$   
395  $0.1167$ ). Once again, we found significantly more Y-biased expression in pollen  
396 (47.8% Y overexpressed, 35.5% X overexpressed) relative to leaf (Fisher's exact  
397 test,  $P < 0.0001$ ).

398 The occurrence of widespread Y-overexpression in pollen of both species is  
399 consistent with the hypothesis that haploid gametophytic selection plays a significant  
400 role in the evolution of sex chromosomes (adaptive linkage) and suggests that Y-  
401 linked alleles are preferentially upregulated in the haploid phase, for which they have  
402 been optimised. The overall prevalence of X-overexpression in *R. rothschildianus*  
403 confirms previous findings that X-linked alleles appear to be more highly expressed  
404 when their Y-linked orthologs accumulate deleterious mutations due to inefficient  
405 selection (Crowson et al. 2017). Given that the sex chromosomes of *R.*  
406 *rothschildianus* are far more degenerate than those of *R. hastatulus* it is expected  
407 that this pattern of widespread X overexpression is more prominent in *R.*  
408 *rothschildianus*. We interpret the lack of widespread Y-overexpression in male flower

409 buds as an indicator that sexual antagonism in flower buds contributes less to the  
410 evolution of sex chromosomes in the two *Rumex* species than haploid selection.  
411 Alternatively, it could be that sexual antagonism is resolved through mechanisms that  
412 do not leave a signature in allelic expression patterns. However, this may be unlikely  
413 given that sexual antagonism has previously been linked with allele-specific  
414 expression changes in plants (Zemp et al. 2016).

415         Given the evidence for pollen specialization on the Y chromosome, the early  
416 stages of sex chromosome evolution in *Rumex* may have been driven by haploid  
417 selection. It has been proposed that this should lead to male-biased sex ratios in  
418 populations (Scott and Otto 2017); however, contemporary populations of several  
419 *Rumex* species, including both species studied here typically show female biased sex  
420 ratios (Putwain and Harper 1972; Zarzycki and Rychlewski 1972; Klimes 1993;  
421 Rottenberg 1998; Stehlik and Barrett 2005; Pickup and Barrett 2013), suggesting  
422 superior pollen competitive ability of the X chromosome. This discrepancy might be  
423 explained by subsequent Y-chromosome degeneration driven by inefficient linked  
424 selection, despite the residual signal of pollen specialization on the Y (Scott and Otto  
425 2017). If plant Y chromosomes do indeed contain many genes important in pollen  
426 competition, Y degeneration should then be particularly harmful for the competitive  
427 ability of Y-bearing pollen leading to the observed female biased sex ratios.

428

## 429 **Conclusion**

430 We report evidence that differential retention of pollen-expressed genes during  
431 degeneration, pollenization upon divergence, and adaptive linkage of pollen-  
432 expressed genes each contribute to the enrichment of Y chromosomes for pollen

433 expressed genes. As previously reported in *Silene latifolia* (Chibalina and Filatov  
434 2011), haploid selection can slow the degeneration of Y chromosomes despite the  
435 reduced efficacy of selection predicted to be associated with the loss of  
436 recombination (Charlesworth 1996). The slow pace of degeneration of Y  
437 chromosomes as a result of haploid selection may help to explain the overall rarity of  
438 heteromorphic sex chromosomes in plants. Furthermore, our results provide  
439 evidence for the influence of haploid selection during the early stages of sex  
440 chromosome evolution. Similar to the increased sex-specific expression on animal  
441 sex chromosome, we find sex-specific transmission produces unique conditions  
442 whereby the Y chromosome can specialize for pollen competition. These results  
443 support the theoretical prediction of Scott and Otto (2017) that haploid selection can  
444 contribute to the arrest in recombination between nascent sex chromosomes.

445

#### 446 **Acknowledgements**

447 The authors would like to thank Daisy Crowson and Tia Harrison for help with RNA  
448 extraction from pollen and flower buds. This research was funded by Natural  
449 Sciences and Engineering Research Council of Canada Discovery grants (to  
450 S.C.H.B. and S.I.W.) and an EWR Steacie fellowship (to S.I.W.).

451

#### 452 **Author Contributions**

453 SIW, SCHB and GS conceived of and designed the study, GS collected the data, GS  
454 and FEGB analysed the data, all authors contributed to the writing of the paper.

455

456

457 **Conflict of interest**

458 The authors declare no conflict of interest.

459

460 **Literature Cited**

461 Albritton, S. E., A.-L. Kranz, P. Rao, M. Kramer, C. Dieterich, and S. Ercan. 2014.

462 Sex-biased gene expression and evolution of the X chromosome in

463 nematodes. *Genetics* **197**:865–883.

464 Allen, S. L., R. Bonduriansky, and S. F. Chenoweth. 2013. The genomic distribution

465 of sex-biased genes in *Drosophila serrata*: X chromosome demasculinization,

466 feminization, and hyperexpression in both sexes. *Genome Biol. Evol.* **5**:1986–

467 1994.

468 Arunkumar, R., E. B. Josephs, R. J. Williamson, and S. I. Wright. 2013. Pollen-

469 specific, but not sperm-specific, genes show stronger purifying selection and

470 higher rates of positive selection than sporophytic genes in *Capsella*

471 *grandiflora*. *Mol. Biol. Evol.* **30**:2475–2486.

472 Borges, F., G. Gomes, R. Gardner, N. Moreno, S. McCormick, J. A. Feijó, and J. D.

473 Becker. 2008. Comparative transcriptomics of *Arabidopsis* sperm cells. *Plant*

474 *Physiol.* **148**:1168–1181.

475 Charlesworth, B. 1996. The evolution of chromosomal sex determination and dosage

476 compensation. *Curr. Biol.* **6**:149–162.

477 Charlesworth, D. 2002. Plant sex determination and sex chromosomes. *Heredity*

478 **88**:94–101.

479 Chibalina, M. V., and D. A. Filatov. 2011. Plant Y chromosome degeneration is

480 retarded by haploid purifying selection. *Curr. Biol.* **21**:1475–1479.

- 481 Crowson, D., S. C. H. Barrett, and S. I. Wright. 2017. Purifying and positive selection  
482 influence patterns of gene loss and gene expression in the evolution of a plant  
483 sex chromosome system. *Mol. Biol. Evol.* **34**:1140–1154.
- 484 Delph, L. F., A. M. Arntz, C. Scotti-Saintagne, and I. Scotti. 2010. The genomic  
485 architecture of sexual dimorphism in the dioecious plant *Silene latifolia*.  
486 *Evolution* **64**:2873–2886.
- 487 Dobin, A., C. A. Davis, F. Schlesinger, J. Drenkow, C. Zaleski, S. Jha, P. Batut, M.  
488 Chaisson, and T. R. Gingeras. 2013. STAR: ultrafast universal RNA-seq  
489 aligner. *Bioinformatics* **29**:15–21.
- 490 Edsgård, D., M. J. Iglesias, S.-J. Reilly, A. Hamsten, P. Tornvall, J. Odeberg, and O.  
491 Emanuelsson. 2016. GeneiASE: Detection of condition-dependent and static  
492 allele-specific expression from RNA-seq data without haplotype information.  
493 *Sci. Rep.* **6**:21134.
- 494 Foerster, K., T. Coulson, B. C. Sheldon, J. M. Pemberton, T. H. Clutton-Brock, and L.  
495 E. B. Kruuk. 2007. Sexually antagonistic genetic variation for fitness in red  
496 deer. *Nature* **447**:1107–1110.
- 497 Gerstein, A. C., and S. P. Otto. 2009. Ploidy and the causes of genomic evolution. *J.*  
498 *Hered.* **100**:571–581.
- 499 Haldane, J. B. S. 1933. The part played by recurrent mutation in evolution. *Am. Nat.*  
500 **67**:5–19.
- 501 Harkess, A., F. Mercati, H.-Y. Shan, F. Sunseri, A. Falavigna, and J. Leebens-Mack.  
502 2015. Sex-biased gene expression in dioecious garden asparagus (*Asparagus*  
503 *officinalis*). *New Phytol.* **207**:883–892.

- 504 Honys, D., and D. Twell. 2004. Transcriptome analysis of haploid male gametophyte  
505 development in *Arabidopsis*. *Genome Biol.* **5**:R85.
- 506 Hough, J., J. D. Hollister, W. Wang, S. C. H. Barrett, and S. I. Wright. 2014. Genetic  
507 degeneration of old and young Y chromosomes in the flowering plant *Rumex*  
508 *hastatulus*. *Proc. Natl. Acad. Sci.* **111**:7713–7718.
- 509 Hough, J., W. Wang, S. C. H. Barrett, and S. I. Wright. 2017. Hill-Robertson  
510 interference reduces genetic diversity on a young plant Y-chromosome.  
511 *Genetics* **207**:685-695.
- 512 Innocenti, P., and E. H. Morrow. 2010. The sexually antagonistic genes of *Drosophila*  
513 *melanogaster*. *PLOS Biol.* **8**:e1000335.
- 514 Klimes, L. 1993. Sex ratios in dioecious *Rumex tuberosus* populations along a  
515 successional gradient. *Preslia* **65**:335–340.
- 516 Lahn, B. T., and D. C. Page. 1997. Functional coherence of the human Y  
517 chromosome. *Science* **278**:675–680.
- 518 Lenormand, T. 2003. The evolution of sex dimorphism in recombination. *Genetics*  
519 **163**:811–822.
- 520 Li, H., B. Handsaker, A. Wysoker, T. Fennell, J. Ruan, N. Homer, G. Marth, G.  
521 Abecasis, R. Durbin, and 1000 Genome Project Data Processing Subgroup.  
522 2009. The sequence alignment/map format and SAMtools. *Bioinforma. Oxf.*  
523 *Engl.* **25**:2078–2079.
- 524 Love, M. I., W. Huber, and S. Anders. 2014. Moderated estimation of fold change and  
525 dispersion for RNA-seq data with DESeq2. *Genome Biol.* **15**:550.
- 526 McKenna, A., M. Hanna, E. Banks, A. Sivachenko, K. Cibulskis, A. Kernytsky, K.  
527 Garimella, D. Altshuler, S. Gabriel, M. Daly, and M. A. DePristo. 2010. The

- 528 genome analysis toolkit: a mapreduce framework for analyzing next-  
529 generation DNA sequencing data. *Genome Res.* **20**:1297–1303.
- 530 Moore, J. C., and J. R. Pannell. 2011. Sexual selection in plants. *Curr. Biol.*  
531 **21**:R176–R182.
- 532 Pickup, M., and S. C. H. Barrett. 2013. The influence of demography and local mating  
533 environment on sex ratios in a wind-pollinated dioecious plant. *Ecol. Evol.*  
534 **3**:629–639.
- 535 Prince, E. G., D. Kirkland, and J. P. Demuth. 2010. Hyperexpression of the X  
536 chromosome in both sexes results in extensive female bias of X-linked genes  
537 in the flour beetle. *Genome Biol. Evol.* **2**:336–346.
- 538 Pucholt, P., A. E. Wright, L. L. Conze, J. E. Mank, and S. Berlin. 2017. Recent sex  
539 chromosome divergence despite ancient dioecy in the willow *Salix viminalis*.  
540 *Mol. Biol. Evol.* **34**:1991–2001.
- 541 Putwain, P. D., and J. L. Harper. 1972. Studies in the dynamics of plant populations:  
542 V. Mechanisms governing the sex ratio in *Rumex acetosa* and *R. acetosella*.  
543 *J. Ecol.* **60**:113–129.
- 544 Ramsköld, D., E. T. Wang, C. B. Burge, and R. Sandberg. 2009. An abundance of  
545 ubiquitously expressed genes revealed by tissue transcriptome sequence  
546 data. *PLOS Comput. Biol.* **5**:e1000598.
- 547 Renner, S. S. 2014. The relative and absolute frequencies of angiosperm sexual  
548 systems: dioecy, monoecy, gynodioecy, and an updated online database. *Am.*  
549 *J. Bot.* **101**:1588–1596.
- 550 Rice, W. R. 1984. Sex chromosomes and the evolution of sexual dimorphism. *Evol.*  
551 *Int. J. Org. Evol.* **38**:735–742.

- 552 Rottenberg, A. 1998. Sex ratio and gender stability in the dioecious plants of Israel.  
553 *Bot. J. Linn. Soc.* **128**:137–148.
- 554 Scott, M. F., and S. P. Otto. 2017. Haploid selection favors suppressed  
555 recombination between sex chromosomes despite causing biased sex ratios.  
556 *Genetics* **207**:1631–1649.
- 557 Stehlik, I., and S. C. H. Barrett. 2005. Mechanisms governing sex-ratio variation in  
558 dioecious *Rumex nivalis*. *Evol. Int. J. Org. Evol.* **59**:814–825.
- 559 Stehlik, I., J. Friedman, and S. C. H. Barrett. 2008. Environmental influence on  
560 primary sex ratio in a dioecious plant. *Proc. Natl. Acad. Sci.* **105**:10847–  
561 10852.
- 562 Wright, A. E., I. Darolti, N. I. Bloch, V. Oostra, B. Sandkam, S. D. Buechel, N. Kolm,  
563 F. Breden, B. Vicoso, and J. E. Mank. 2017. Convergent recombination  
564 suppression suggests role of sexual selection in guppy sex chromosome  
565 formation. *Nat. Commun.* **8**:14251.
- 566 Zarzycki, K., and J. Rychlewski. 1972. Sex ratios in polish natural populations and in  
567 seedling samples of *Rumex acetosa* L. and *Rumex thyrsiflorus* Fing. *Acta Biol.*  
568 *Cracoviensia Ser. Bot.* **15**:335–340.
- 569 Zemp, N., R. Tavares, A. Muyle, D. Charlesworth, G. A. B. Marais, and A. Widmer.  
570 2016. Evolution of sex-biased gene expression in a dioecious plant. *Nat.*  
571 *Plants* **2**:16168.
- 572 Zhou, Q., and D. Bachtrog. 2012. Sex-specific adaptation drives early sex  
573 chromosome evolution in *Drosophila*. *Science* **337**:341–345.
- 574



575 **Tables and Figures**

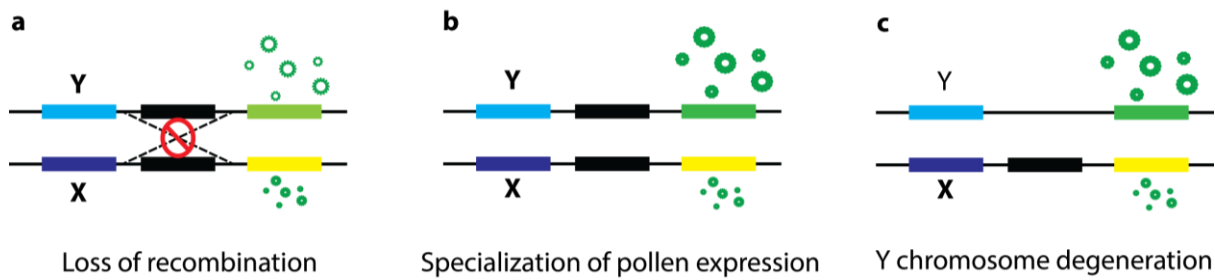

577

578

579 Fig. 1: Depiction of the effects of haploid gametophytic selection on sex

580 chromosomes. Three distinct processes can potentially contribute to biased

581 expression and overrepresentation of pollen genes on the Y chromosome. **a)**

582 Recombination can be lost between the male determining region (Y) and any allele

583 that increases pollen fitness (the green allele). **b)** Without recombination, alleles with

584 pollen-specific fitness can diverge, or their expression can increase relative to the X-

585 linked allele. **c)** As inefficient selection due to linkage causes degeneration of Y-

586 linked alleles, haploid selection during pollen competition may cause biased retention

587 of genes with pollen-specific fitness effects

588

589

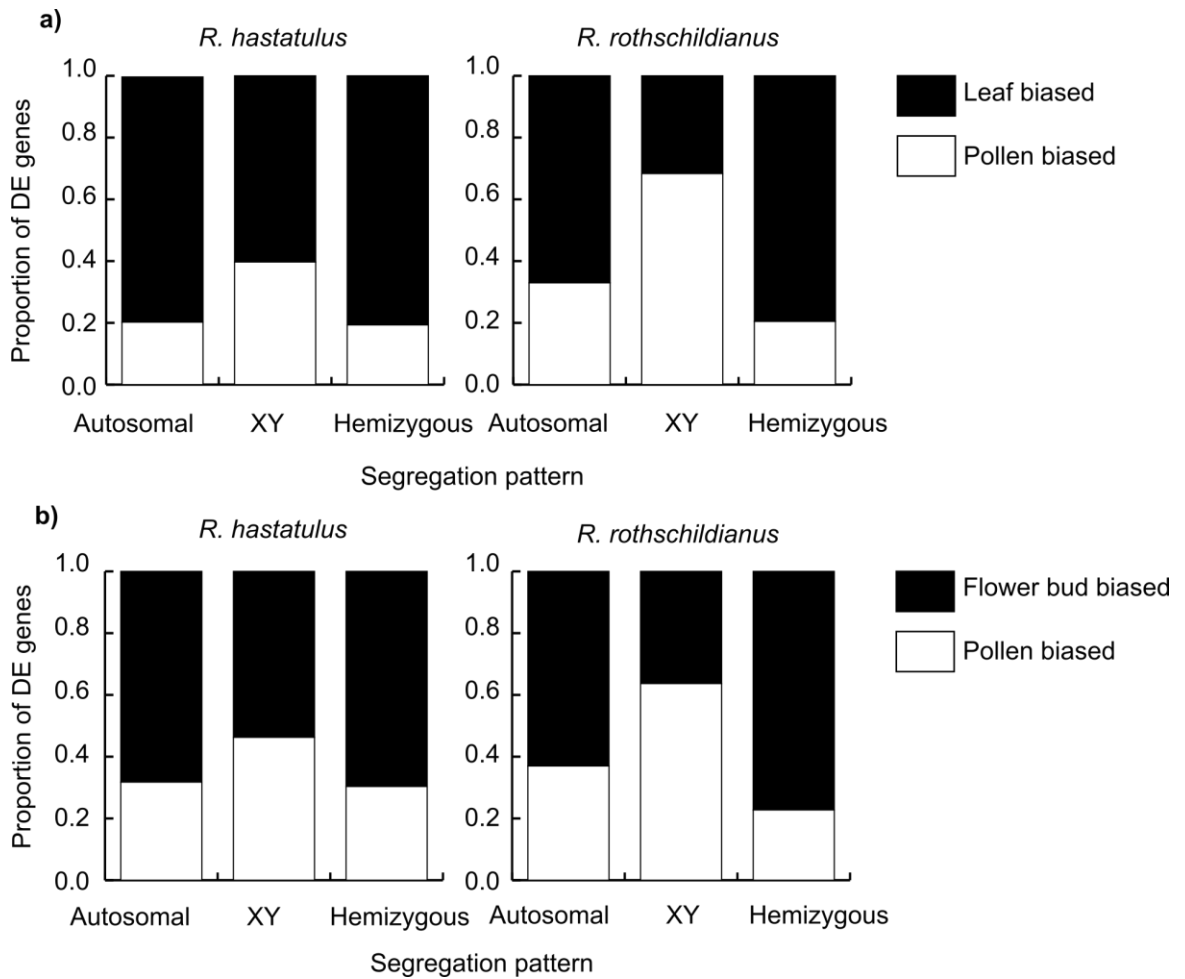

590

591

592 Fig. 2: Tissue expression bias of different gene groups in two *Rumex* species. Bar  
593 segments represent the fraction of genes with significant differential-expression (DE)  
594 in two pairwise tissue comparisons.

595

596

597

598

599

600

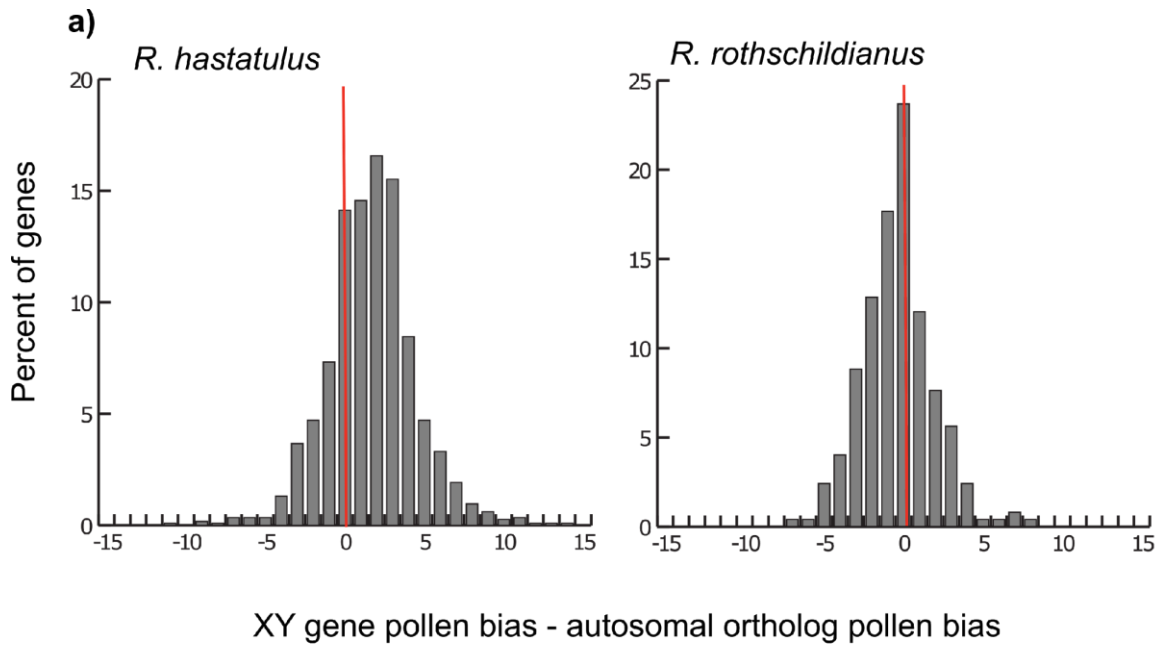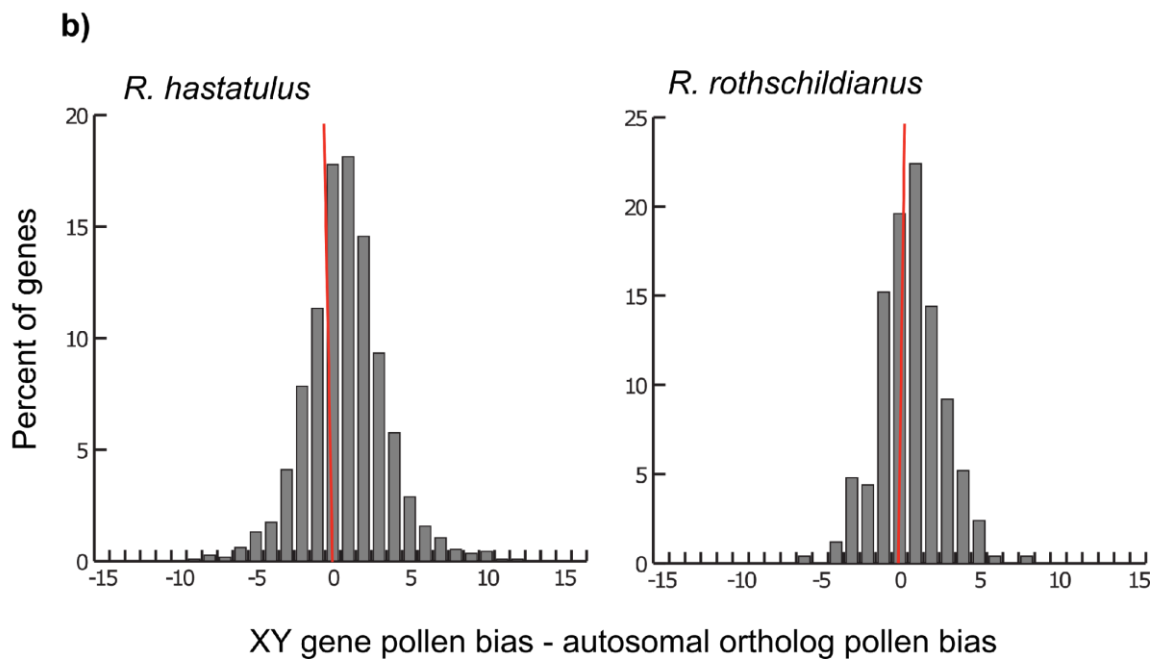

601

602

603 Fig. 3: Differences in normalized tissue expression bias of XY genes and their  
604 autosomal orthologs in two species of *Rumex*. The magnitude and direction of the  
605 differences are related to the evolution of tissue expression in XY genes after their  
606 linkage to the sex chromosomes. Tissue expression data used in the comparisons  
607 include a) leaf/pollen and b) flower bud/pollen. Positive values indicate greater pollen

608 overexpression in XY genes relative to their autosomal orthologs. For details of  
609 normalization see methods.

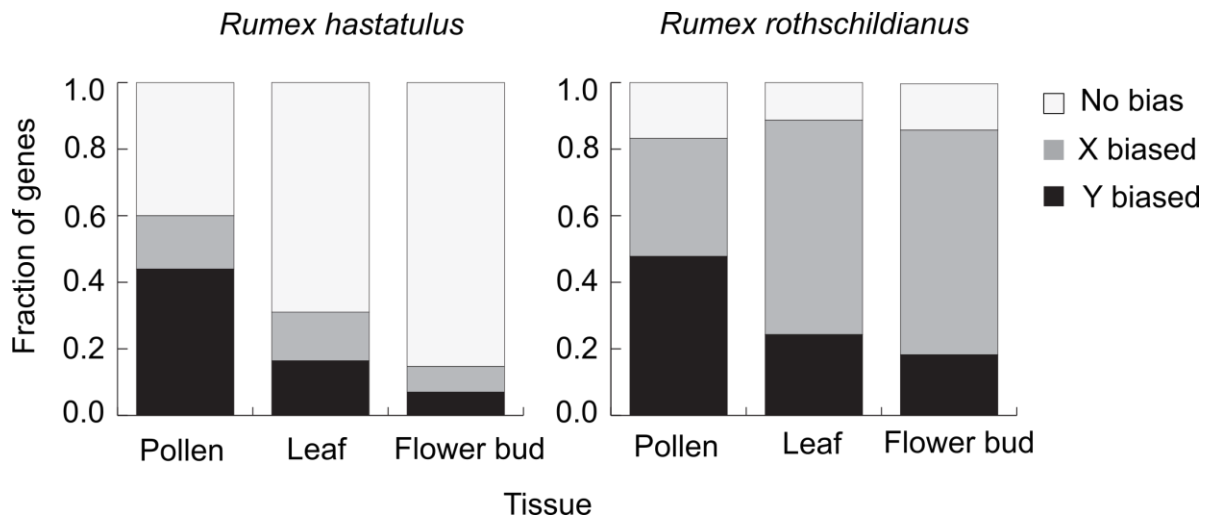

610

611 Fig. 4: Allele specific expression bias of X- and Y-linked genes in two species of  
612 *Rumex*. Bar segments represent the percent of XY genes with no allelic bias (white),  
613 significant X-overexpression (grey), and significant Y-overexpression (black).

614

615

616
